# Supplementary figures and images for: Spectral Profiling (Fourier Transform Infrared Spectroscopy) and Machine Learning for the Recognition of Milk from Different Bovine Breeds
Source: MDPI journal article supplement (doi:10.3390/ani14091271), 2024-04-24

**a**

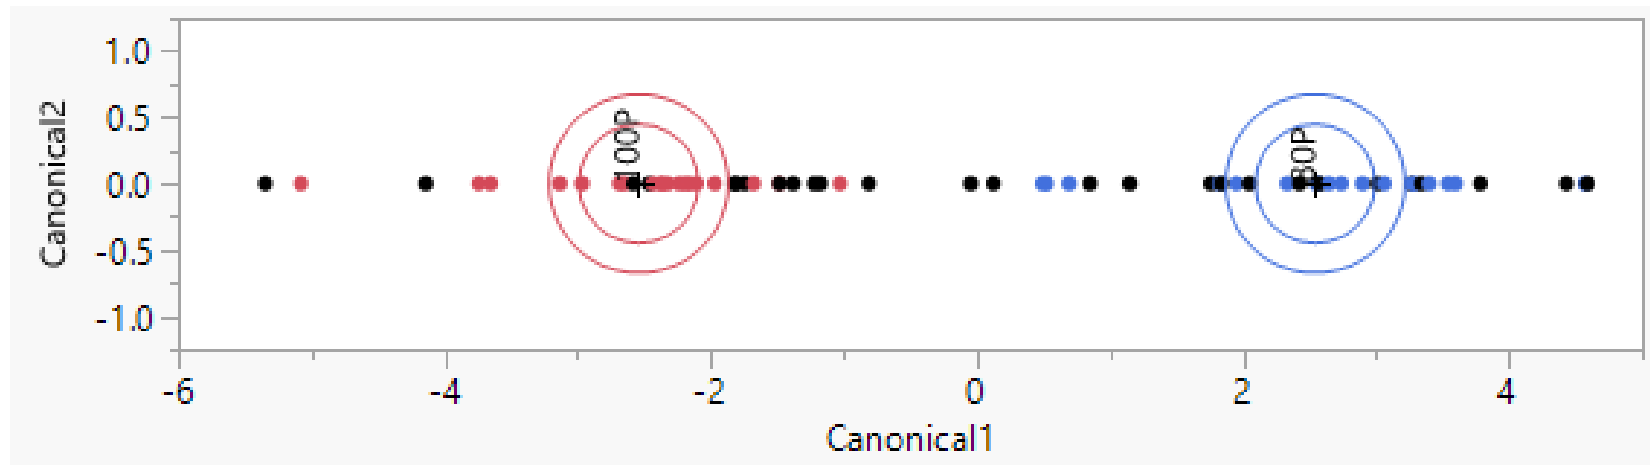

**b**

| Training |                 |     | Excluded |                 |     |
|----------|-----------------|-----|----------|-----------------|-----|
| Actual   | Predicted Count |     | Actual   | Predicted Count |     |
| Sample   | 100P            | 80P | Sample   | 100P            | 80P |
| 100P     | 19              | 0   | 100P     | 11              | 4   |
| 80P      | 0               | 19  | 80P      | 4               | 11  |

Supplement: s1 [file s1]
